# Supplementary material for: Sr4GaNbO8:Mn4+: a novel perovskite-structured red-emitting phosphor for a luminescence lifetime thermometer with good relative sensitivity and repeatability
Source: Royal Society of Chemistry journal article supplement (doi:10.1039/d4tc04916k), 2025-01-01
Supplement: d4tc04916k1.pdf [file d4tc04916k1.pdf]

### Supplementary Information

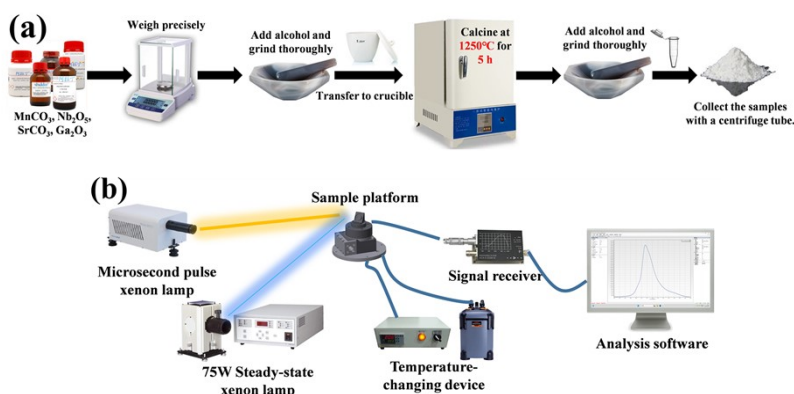

**Fig. S1.** (a) The fabrication process of the red emitting  $\text{Sr}_4\text{GaNbO}_8:\text{Mn}^{4+}$  phosphors. (b) Schematic diagram of the experimental setup used to study the luminescent lifetime, excitation and emission of the sample.

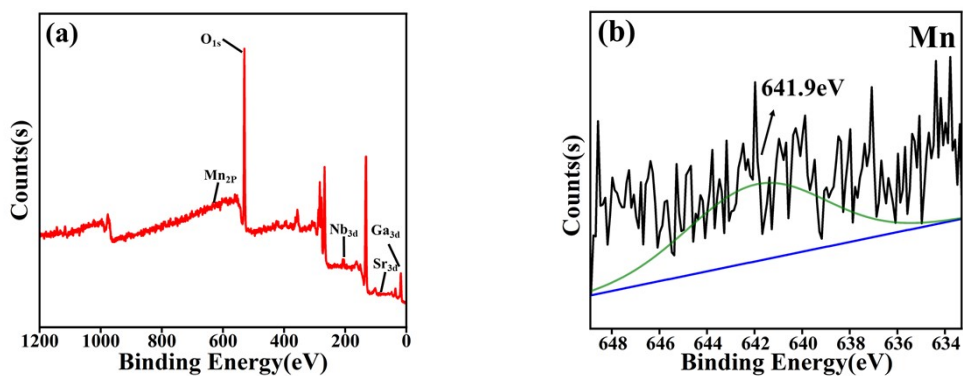

**Fig. S2.** (a) XPS survey scanning spectra of  $\text{Sr}_4\text{GaNbO}_8:0.02\text{Mn}^{4+}$  phosphor. (b) high-resolution XPS spectra of Mn in  $\text{Sr}_4\text{GaNbO}_8:0.02\text{Mn}^{4+}$  phosphor.
